# Supplementary material for: High-temperature synthesis of stable and ordered mesoporous polymer monoliths with low dielectric constants
Source: Royal Society of Chemistry journal article supplement (doi:10.1039/b910682k), 2009-01-01
Supplement: b910682k.pdf [file b910682k.pdf]

## Supplementary data

### **High-Temperature Synthesis of Stable and Ordered Mesoporous Polymer Monoliths with Low Dielectric Constants**

Fujian Liu, Caijin Li, Limin Ren, Xiangju Meng\*, Hao Zhang, and Feng-Shou Xiao\*

*State Key Laboratory of Inorganic Synthesis & Preparative Chemistry, Jilin University, Changchun 130012, China. Fax: (+86) 431-5168624; Tel: (+86) 431-5168590; E-mail: [fsxiao@mail.jlu.edu.cn](mailto:fsxiao@mail.jlu.edu.cn).*

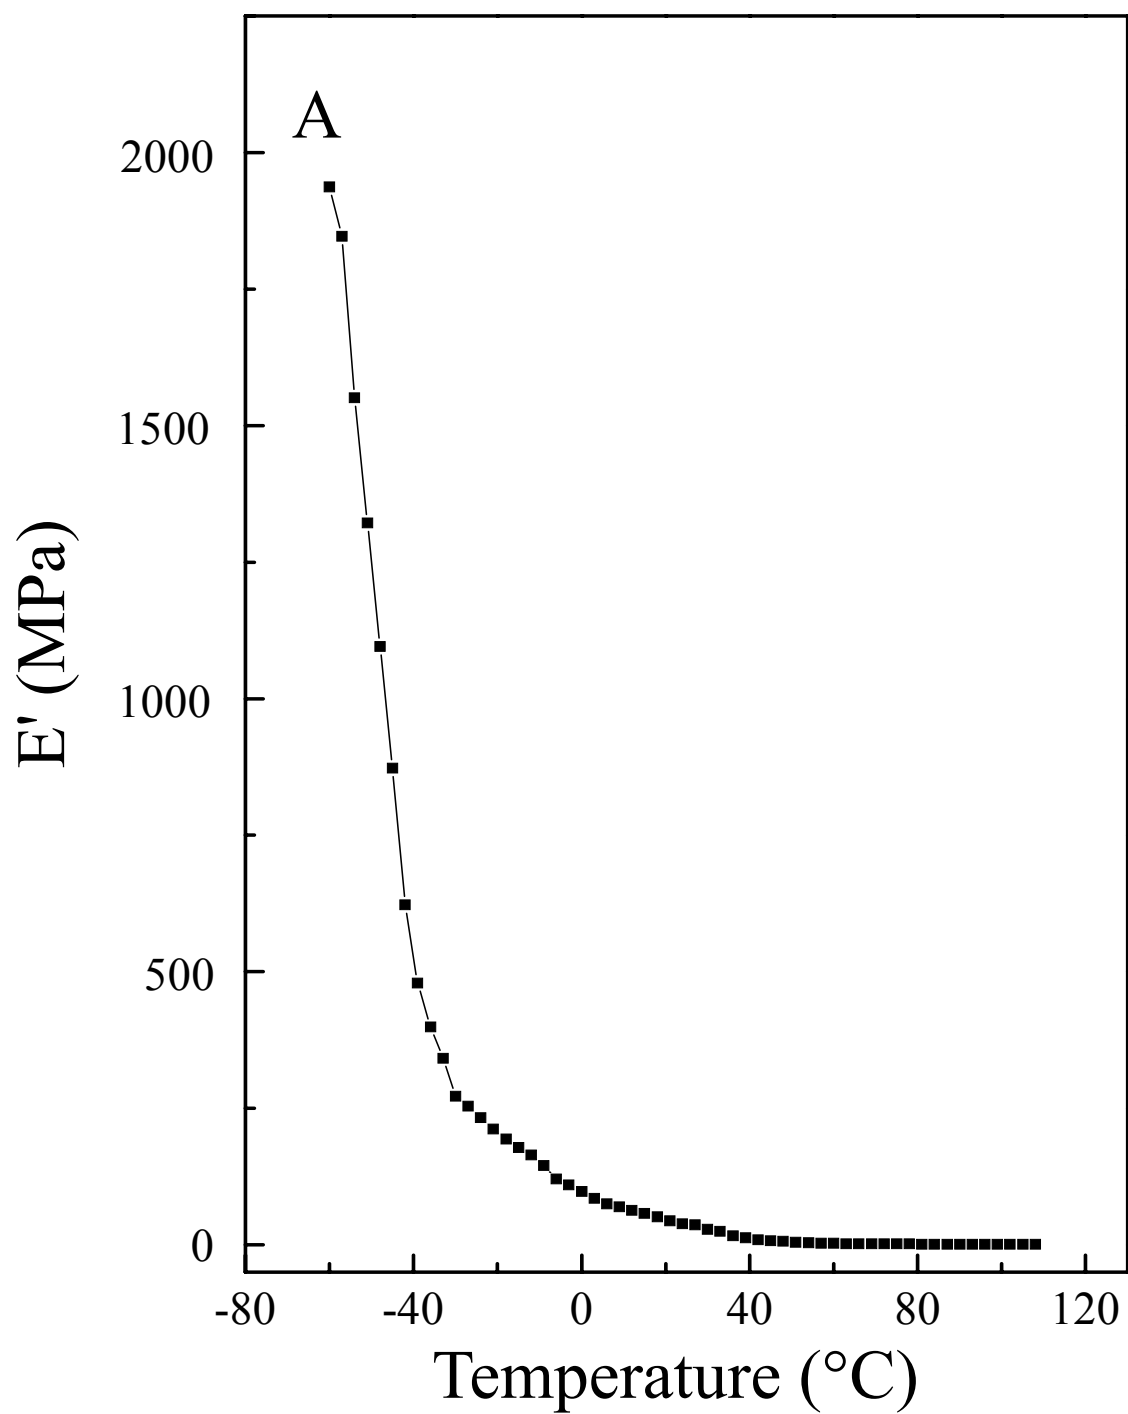

**Fig. S1 (A)** Dynamic mechanical analysis (DMA) of as-synthesized FDU-15.

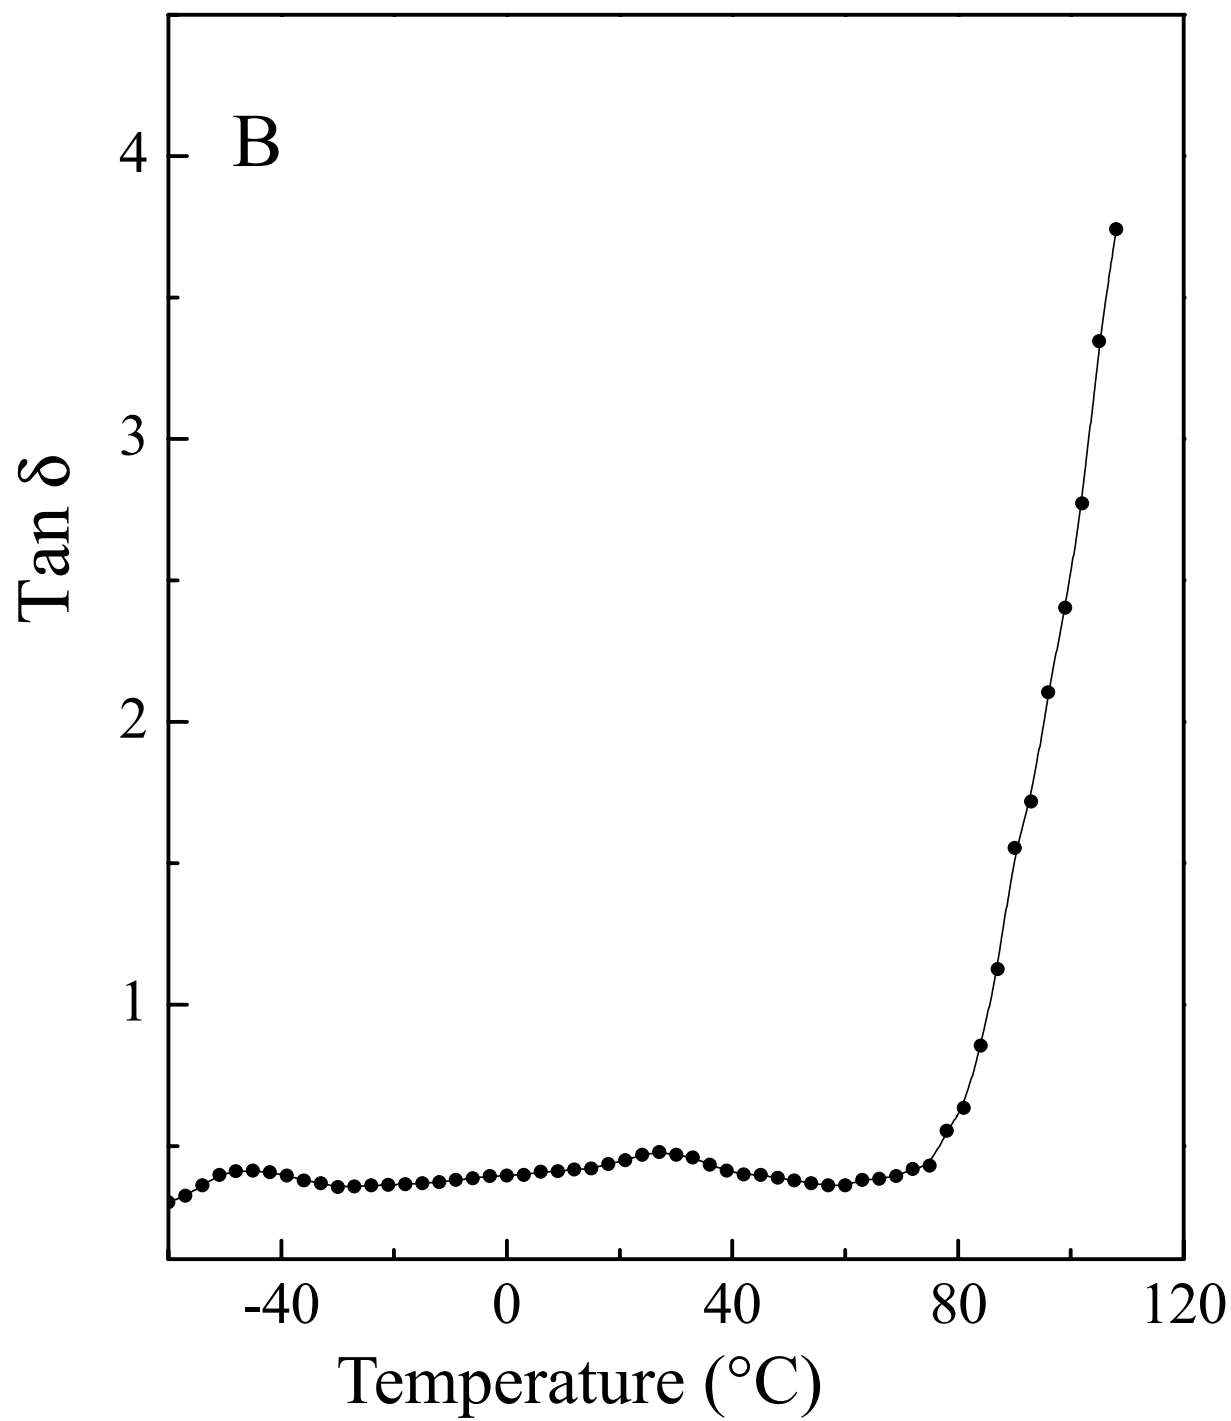

**Fig. S1 (B)** Damping factor of as-synthesized FDU-15.

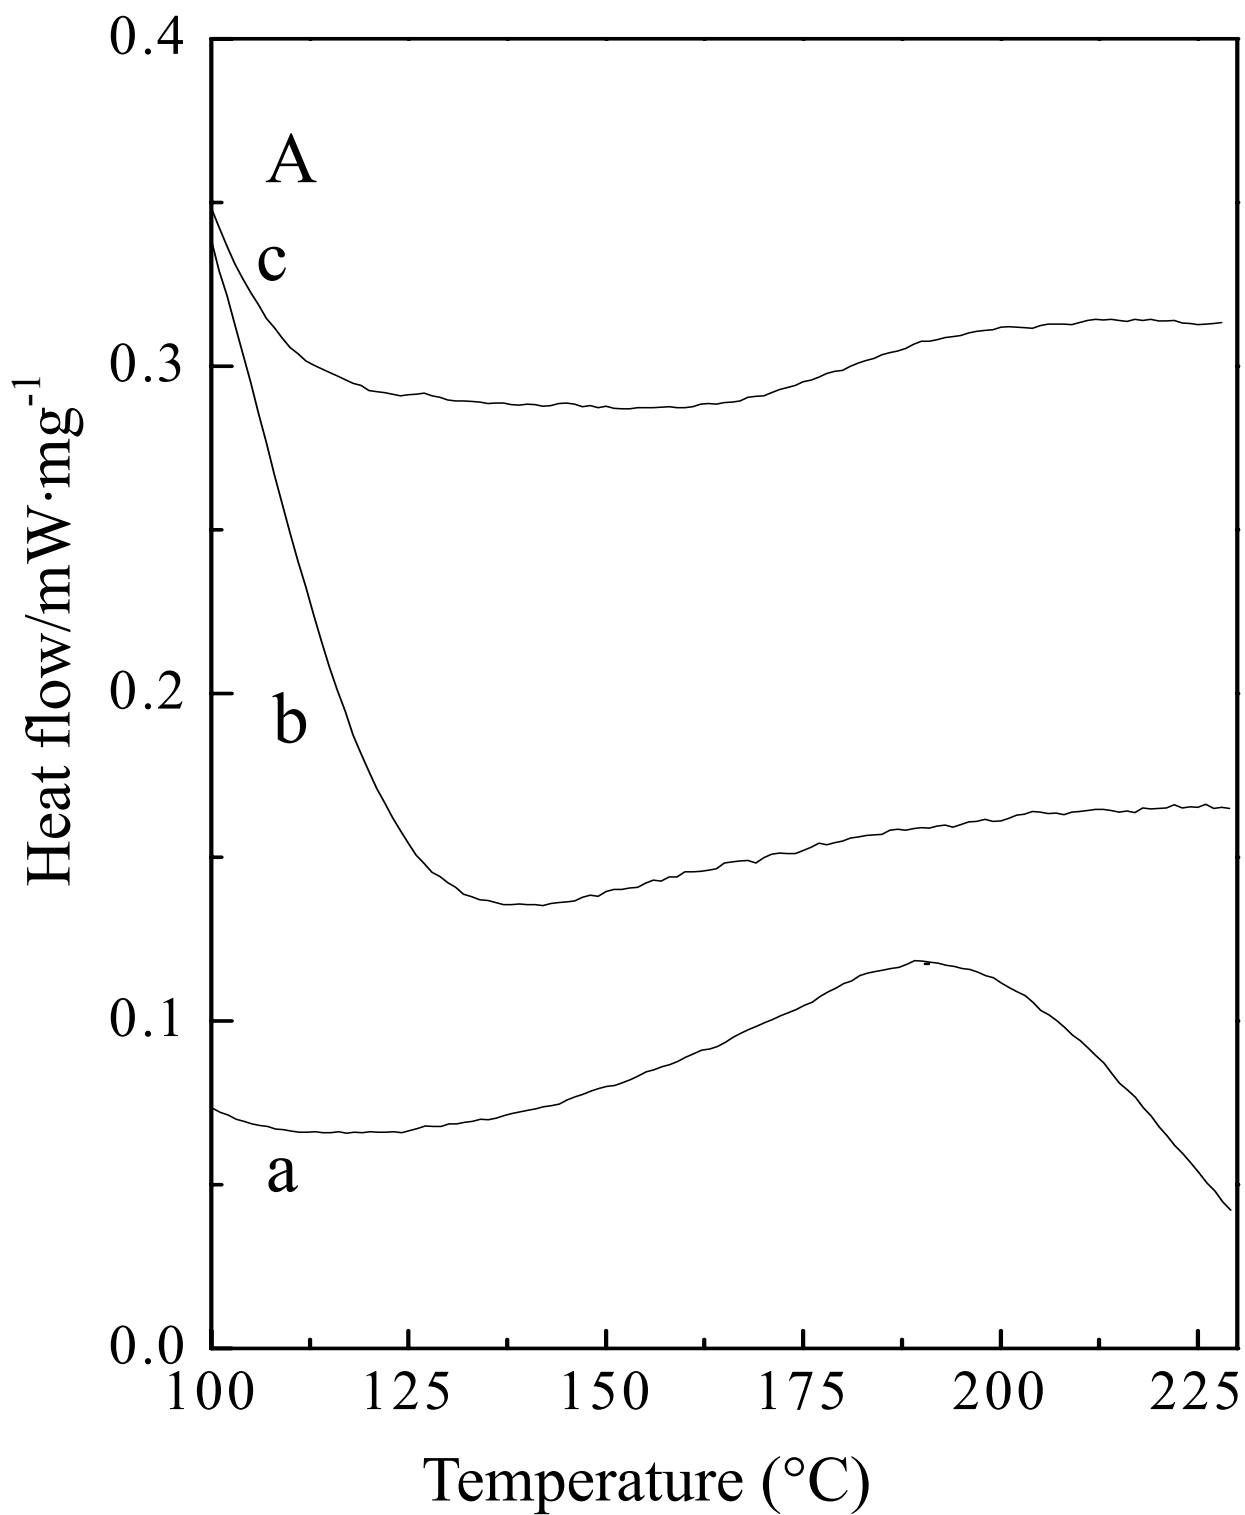

**Fig. S2.** (A) Differential scanning calorimetry (DSC) curves of as-synthesized (a) OMR-100, (b) OMR-200, and (c) OMR-260.

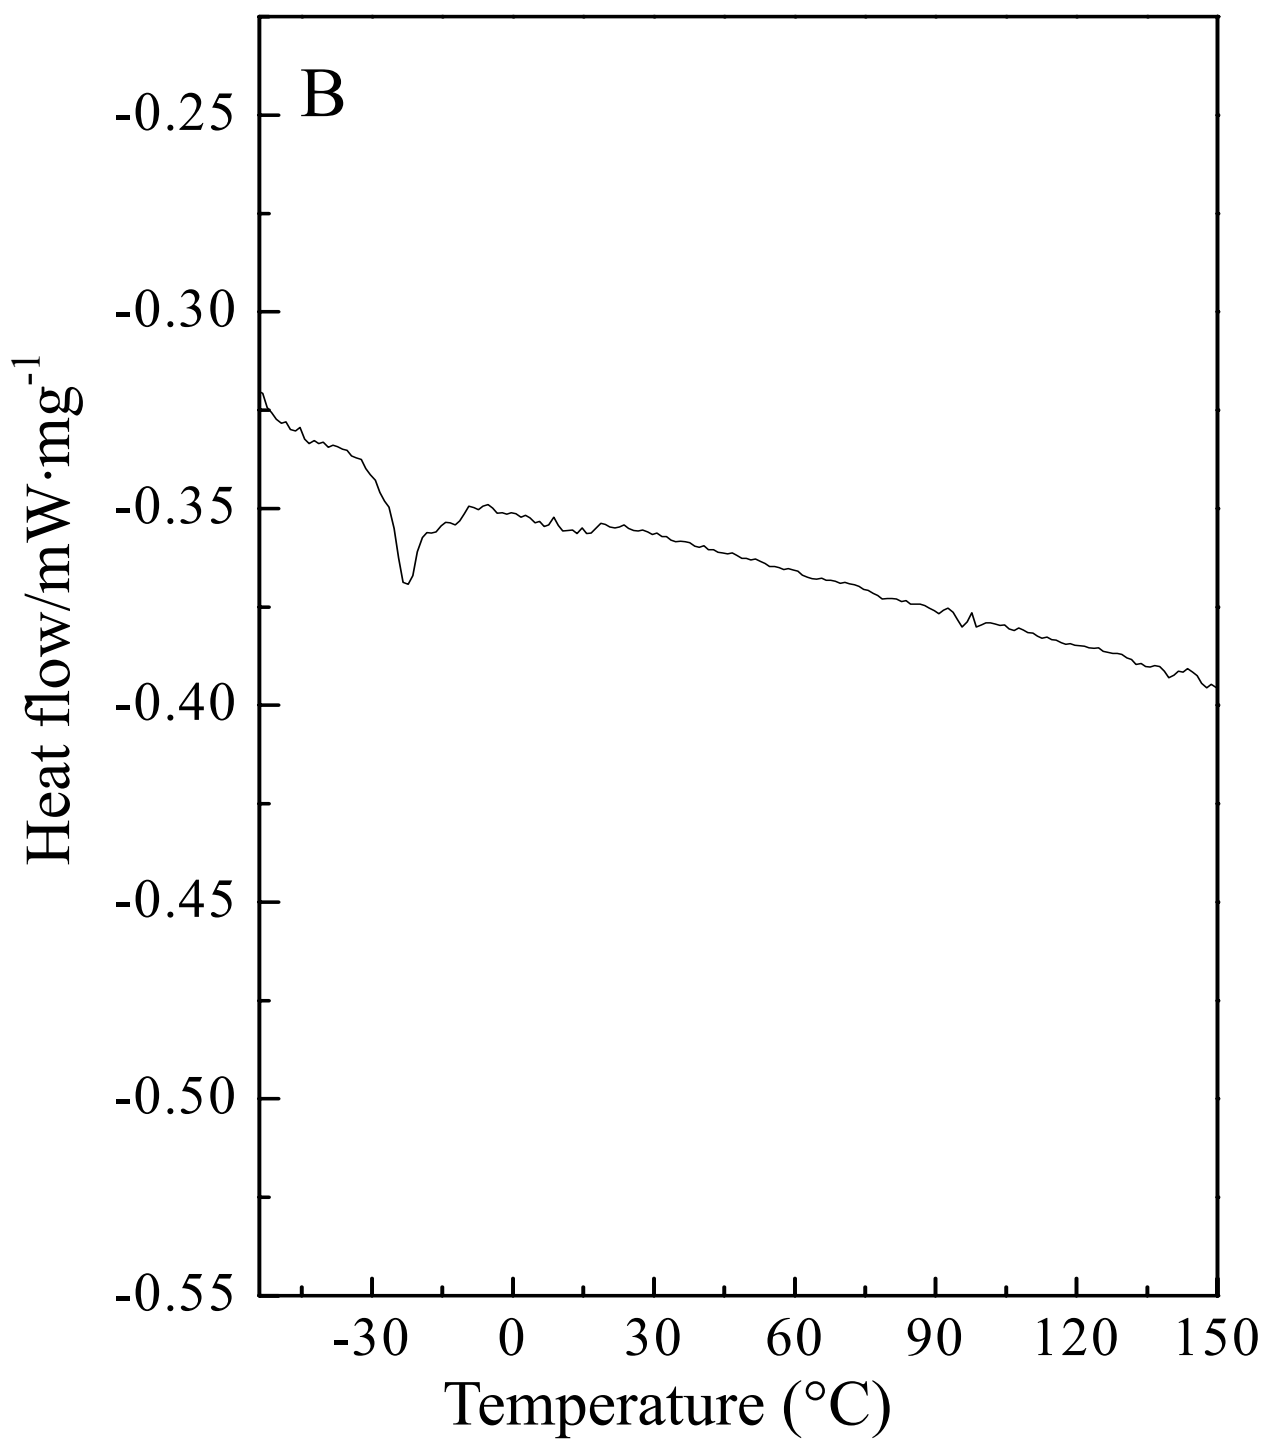

Fig. S2. (B) Differential scanning calorimetry (DSC) curves of as-synthesized FDU-15.

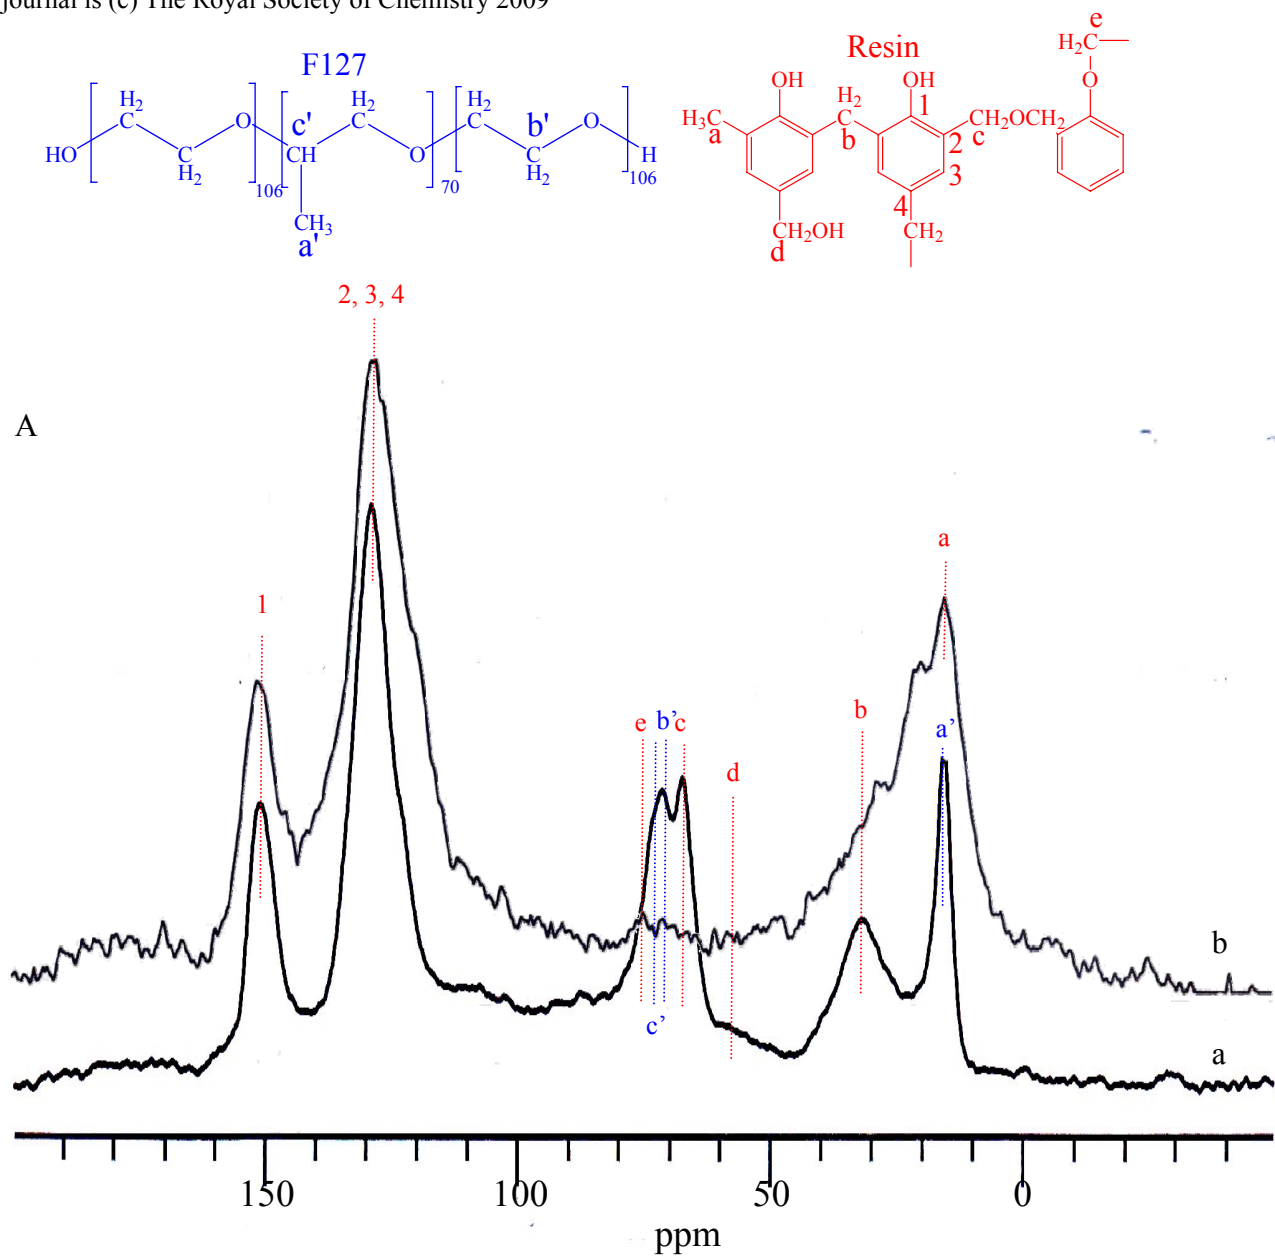

**Fig. S3.** (A)  $^{13}\text{C}$  NMR spectra of OMR-100 before (a) and after (b) calcination.

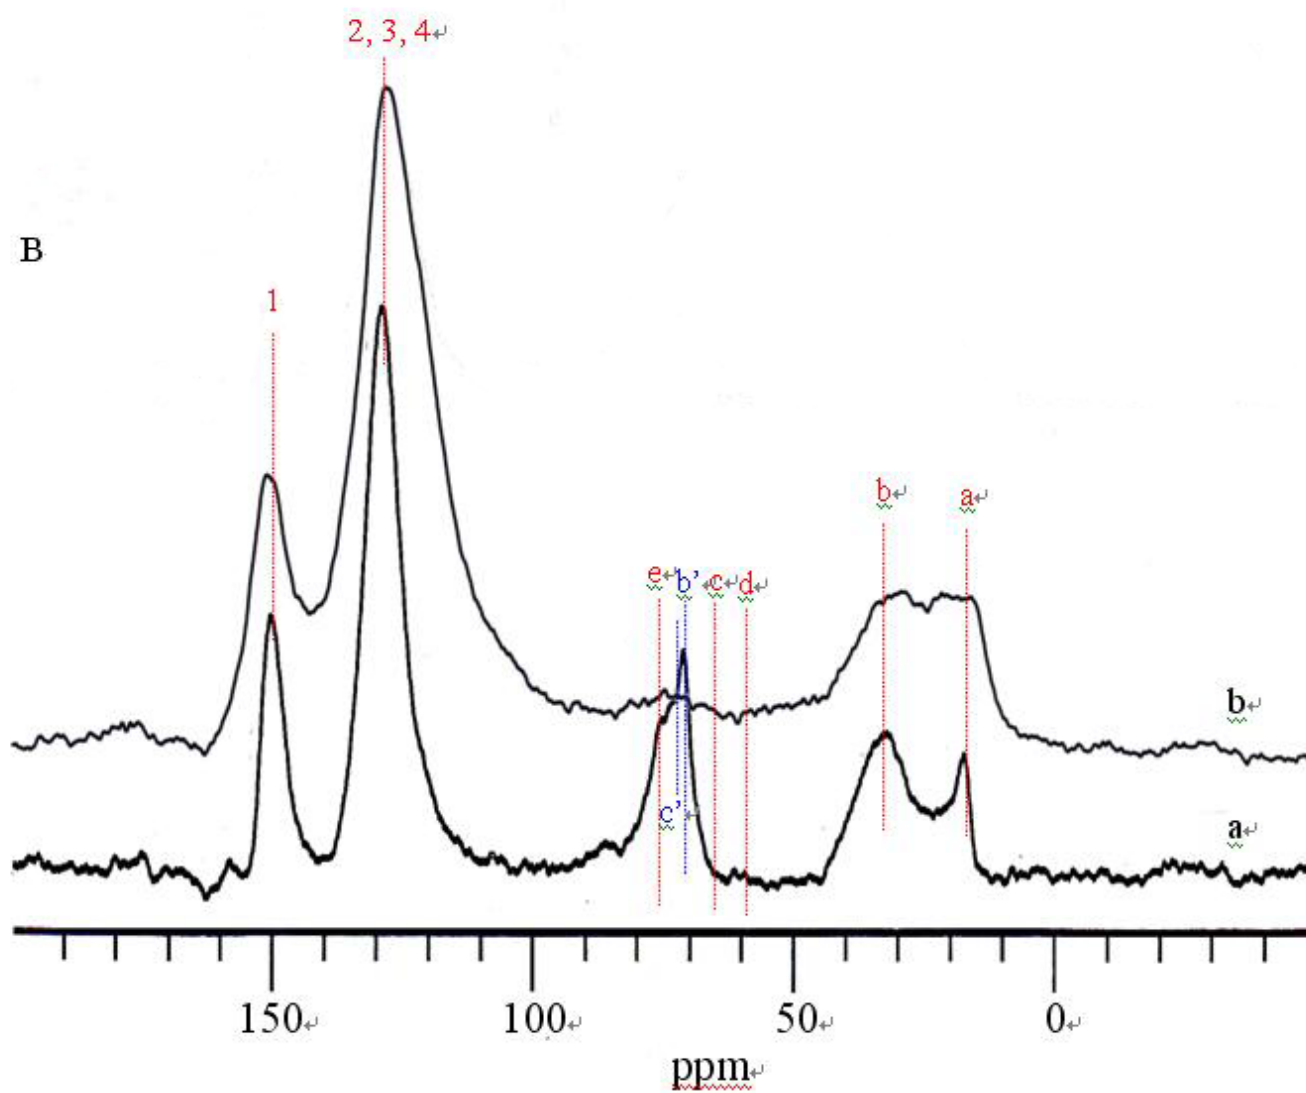

**Fig. S3.** (B)  $^{13}\text{C}$  NMR spectra of OMR-200 before (a) and after (b) calcination.
